# Supplementary material for: Chiral CdSe nanoplatelets as an ultrasensitive probe for lead ion sensing
Source: Royal Society of Chemistry journal article supplement (doi:10.1039/c8nr10506e), 2019-01-01
Supplement: c8nr10506e1.pdf [file c8nr10506e1.pdf]

## Electronic Supplementary Information

### Chiral CdSe Nanoplatelets as an Ultrasensitive Probe for Lead Ion Sensing

Xiongbin Wang,<sup>a,#</sup> Junjie Hao,<sup>a,b,#</sup> Jiaji Cheng,<sup>c,g,#</sup> Junzi Li,<sup>c</sup> Jun Miao,<sup>d,e</sup> Ruxue Li,<sup>a</sup> Yiwen Li,<sup>a,d</sup> Jiagen Li,<sup>f</sup> Yuhui Liu,<sup>a</sup> Xi Zhu,<sup>f</sup> Yanjun Liu,<sup>a</sup> Xiao Wei Sun,<sup>a</sup> Zikang Tang,<sup>d</sup> Marie-Hélène Delville,<sup>b,\*</sup> Tingchao He,<sup>c,\*</sup> and Rui Chen<sup>a,\*</sup>

<sup>a</sup> Department of Electrical and Electronic Engineering, Southern University of Science and Technology, Shenzhen, Guangdong, 518055, P. R. China

<sup>b</sup> University of Bordeaux, CNRS, ICMCB, UMR 5026, F-33608, Pessac, France

<sup>c</sup> College of Physics and Energy, Shenzhen University, Shenzhen, Guangdong, 518060, P. R. China

<sup>d</sup> The Institute of Applied Physics and Materials Engineering, University of Macau, Avenida da Universidade, Taipa, Macau

<sup>e</sup> Department of Materials Science and Engineering, Southern University of Science and Technology, Shenzhen, Guangdong, 518055, P. R. China

<sup>f</sup> School of Science and Engineering, The Chinese University of Hong Kong, Guangdong, 518172, P. R. China

<sup>g</sup> School of Materials Science and Engineering, Hubei University, Wuhan 430062, P. R. China

# These authors contributed equally to this work

\* Corresponding authors: [chen.r@sustc.edu.cn](mailto:chen.r@sustc.edu.cn) (Rui Chen); [marie-helene.delville@icmcb.cnrs.fr](mailto:marie-helene.delville@icmcb.cnrs.fr) (Marie-Hélène Delville); [tche@szu.edu.cn](mailto:tche@szu.edu.cn) (Tingchao He)

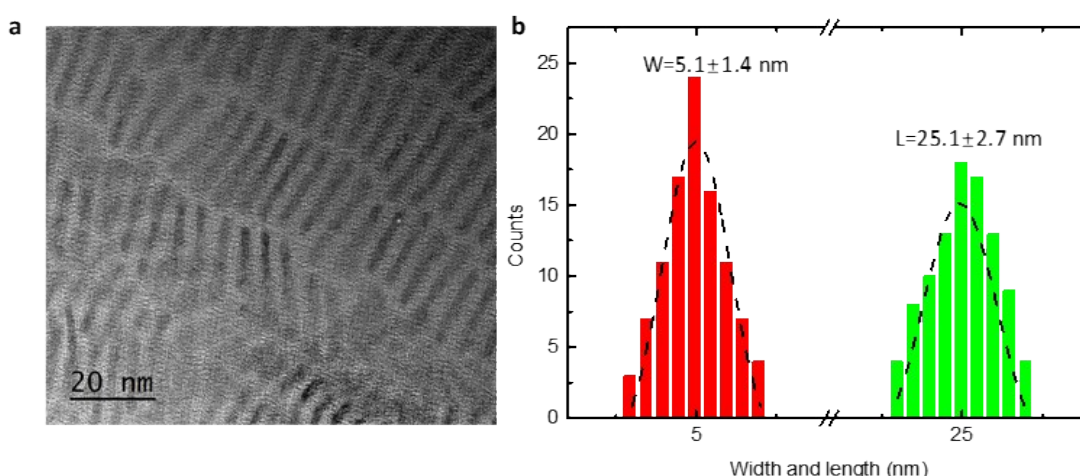

**Figure S1.** (a) TEM image of CdSe NPLs. The corresponding scale bar is 200 nm. (b) Histograms distribution of width and length of CdSe NPLs based on 100 individual NPLs measurements.

The histograms distribution of width and length of CdSe NPLs was fitted using Gauss distribution. The fitted equation was represented as follow:

$$y = y_0 + \frac{A}{\sqrt{2\pi}\sigma} \exp\left(-\frac{(x-\mu)^2}{2\sigma^2}\right)$$

where  $\sigma$  is the standard deviation and  $\mu$  is the mean value of the data. The size distribution ( $\mu - 2\sigma < x < \mu + 2\sigma$ ) of the as-grown NPLs was at the range of  $5.1 \pm 1.4$  nm (for width) and  $25.1 \pm 2.7$  nm (for length).

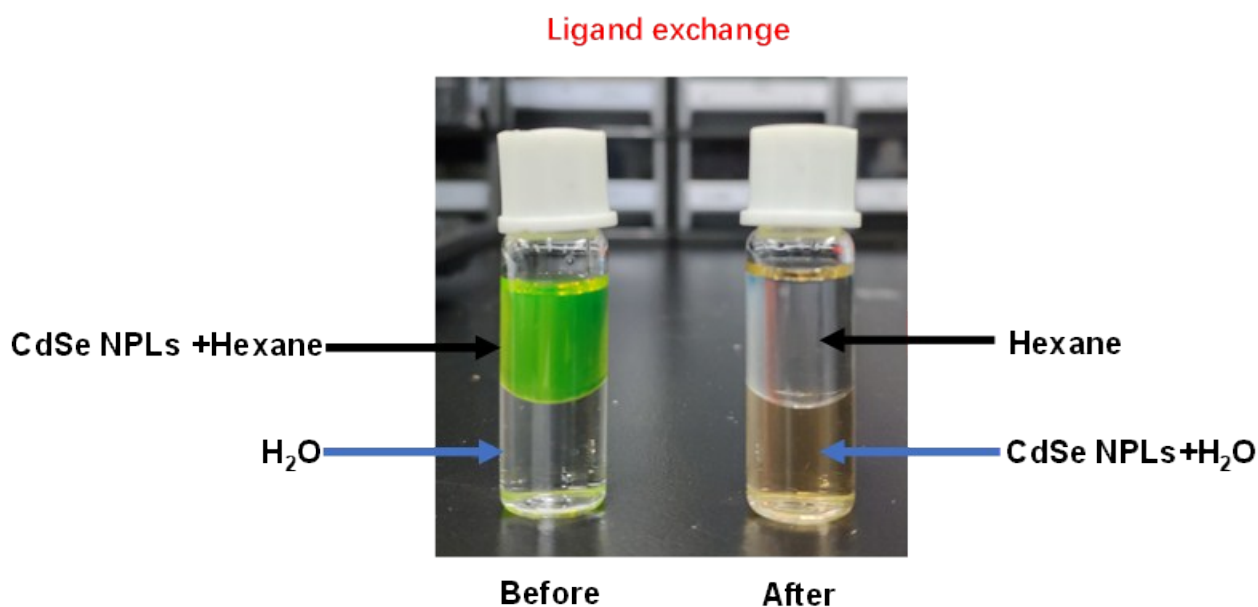

**Figure S2.** Photo of NPLs before and after ligand exchange.

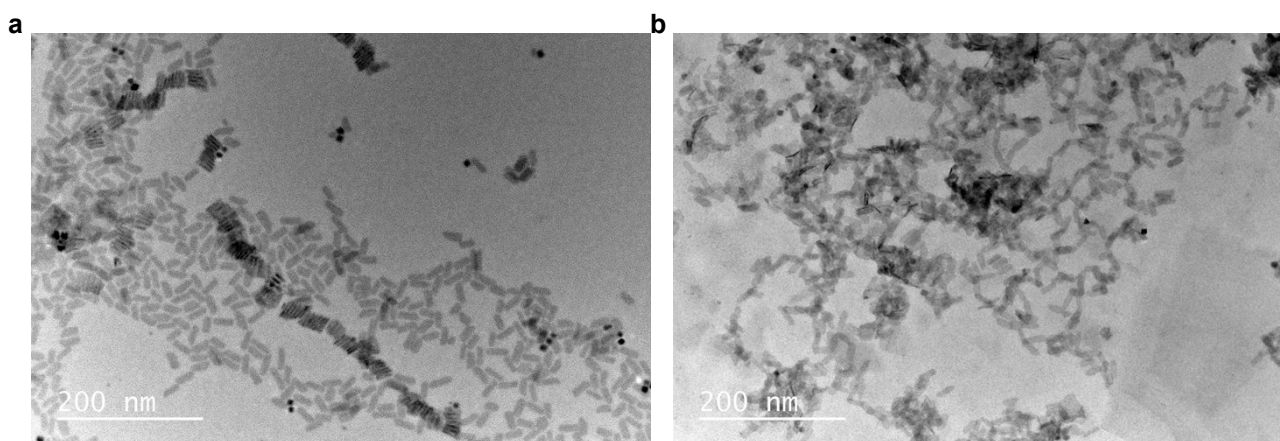

**Figure S3.** TEM image of CdSe NPLs in (a) hexane and (b) water.

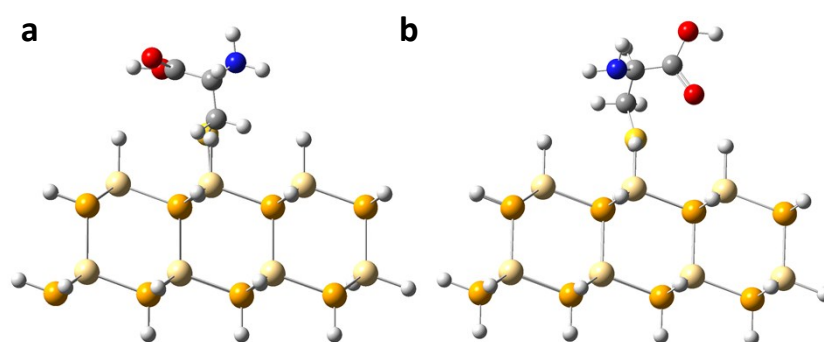

**Figure S4.** The ground state geometries of (a) L-cys and (b) D-cys capped CdSe nanoclusters before optimized.

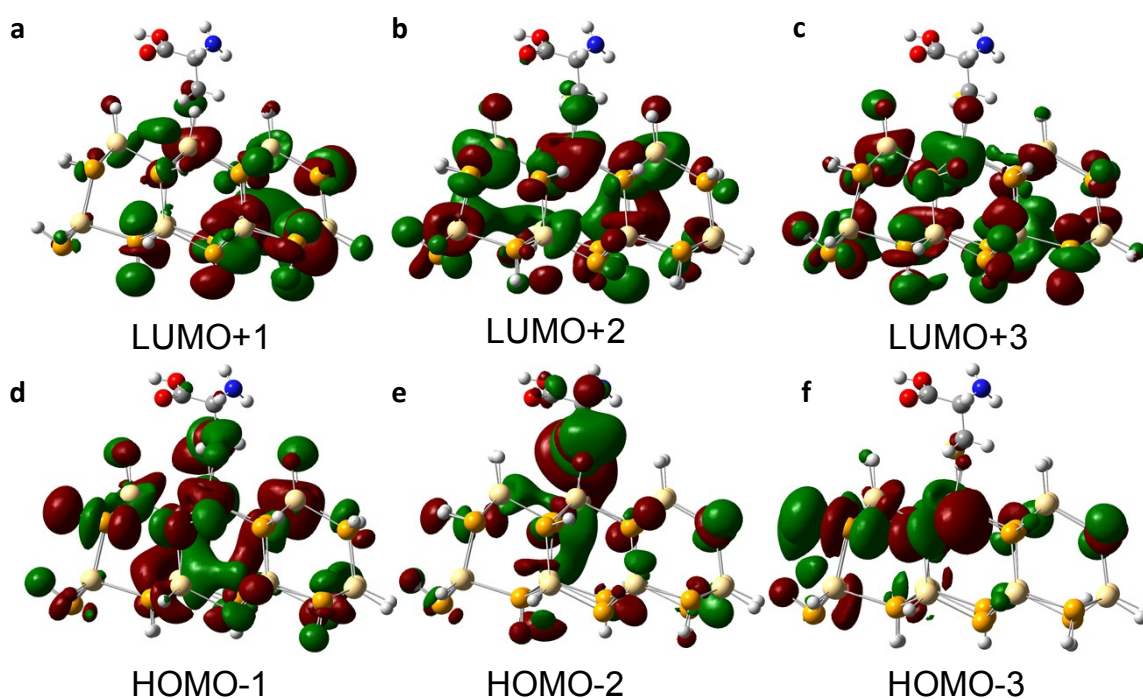

**Figure S5.** Electronic states of L-Cys capped CdSe NPLs (a) LUMO+1 (b) LUMO+2 (c) LUMO+3 (d) HOMO+1 (e) HOMO+2 and (f) HOMO+3.

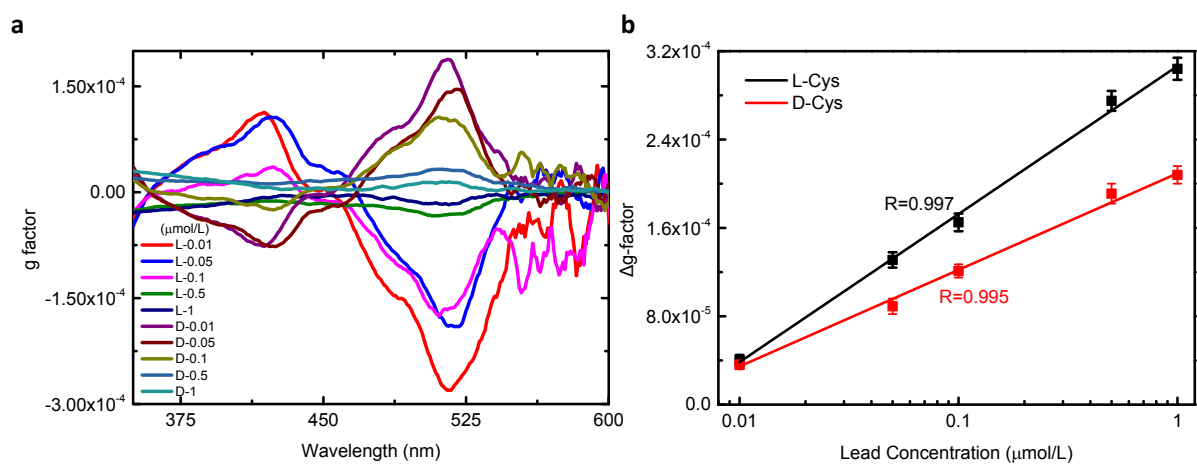

**Figure S6.** (a) G-factor for lead ions detection ranging from 0.01 to 1  $\mu\text{M}$ , both for L- and D-cys capped NPLs. (b) Linear relationship between g-factor at 520 nm and various lead ions concentrations.

**Table S1** Slope of fitted curve shown in Figure 5

|       | Control | $\text{Pb}^{2+}$ | $\text{Ca}^{2+}$ | $\text{Mg}^{2+}$ | $\text{Fe}^{3+}$ | $\text{Cu}^{2+}$ | $\text{Zn}^{2+}$ | $\text{Fe}^{2+}$ |
|-------|---------|------------------|------------------|------------------|------------------|------------------|------------------|------------------|
| Slope | -1.08   | -13.42           | -1.18            | -2.50            | -5.03            | -4.02            | -3.29            | -2.82            |
